# Supplementary material for: A test of the Geographic Mosaic Theory of Coevolution: investigating widespread species of Amazonian Protium (Burseraceae) trees, their chemical defenses, and their associated herbivore faunas
Source: Frontiers journal article supplement (doi:10.3389/fevo.2023.1180274), 2023-08-23
Supplement: Table_2.xlsx [file Table_2.xlsx]

## Sheet: Sheet1
	Protium subserratum (morphotype 3)
	P_blan_1_MA	P_blan_2_MA	P_blan_3_IQ	P_blan_4_MA	P_blan_5_IQ	P_blan_6_MA	P_blan_7_IQ
P_blan_1_MA		0.82	0.77	0.92	0.79	0.66	0.73
P_blan_2_MA	0.82		0.56	0.83	0.86	0.59	0.52
P_blan_3_IQ	0.77	0.56		0.79	0.65	0.84	0.94
P_blan_4_MA	0.92	0.83	0.79		0.85	0.59	0.74
P_blan_5_IQ	0.79	0.86	0.65	0.85		0.68	0.62
P_blan_6_MA	0.66	0.59	0.84	0.59	0.68		0.83
P_blan_7_IQ	0.73	0.52	0.94	0.74	0.62	0.83
	Protium calanense
	P_cala_1_MA	P_cala_11_IQ	P_cala_12_MA	P_cala_13_IQ	P_cala_14_MA	P_cala_15_IQ	P_cala_16_MA	P_cala_17_IQ	P_cala_18_IQ	P_cala_8_MA	P_cala_9_MA
P_cala_1_MA		0.48	0.34	0.47	0.23	0.38	0.29	0.38	0.32	0.64	0.84
P_cala_11_IQ	0.48		0.55	0.94	0.43	0.45	0.55	0.51	0.57	0.56	0.77
P_cala_12_MA	0.34	0.55		0.56	0.78	0.69	0.79	0.79	0.63	0.58	0.45
P_cala_13_IQ	0.47	0.94	0.56		0.51	0.42	0.55	0.49	0.47	0.72	0.75
P_cala_14_MA	0.23	0.43	0.78	0.51		0.22	0.9	0.26	0.32	0.65	0.32
P_cala_15_IQ	0.38	0.45	0.69	0.42	0.22		0.28	0.95	0.86	0.36	0.48
P_cala_16_MA	0.29	0.55	0.79	0.55	0.9	0.28		0.33	0.38	0.54	0.43
P_cala_17_IQ	0.38	0.51	0.79	0.49	0.26	0.95	0.33		0.92	0.41	0.49
P_cala_18_IQ	0.32	0.57	0.63	0.47	0.32	0.86	0.38	0.92		0.46	0.41
P_cala_8_MA	0.64	0.56	0.58	0.72	0.65	0.36	0.54	0.41	0.46		0.67
P_cala_9_MA	0.84	0.77	0.45	0.75	0.32	0.48	0.43	0.49	0.41	0.67
	Protium decandrum
	P_deca_19_MA	P_deca_2_MA	P_deca_21_MA	P_deca_22_MA	P_deca_23_MA	P_deca_24_IQ	P_deca_25_IQ	P_deca_26_IQ	P_deca_27_IQ
P_deca_19_MA		0.74	0.9	0.78	0.68	0.75	0.69	0.75	0.78
P_deca_2_MA	0.74		0.9	0.78	0.84	0.94	0.85	0.78	0.79
P_deca_21_MA	0.9	0.9		0.87	0.76	0.97	0.83	0.89	0.9
P_deca_22_MA	0.78	0.78	0.87		0.85	0.92	0.94	0.97	0.98
P_deca_23_MA	0.68	0.84	0.76	0.85		0.86	0.9	0.81	0.81
P_deca_24_IQ	0.75	0.94	0.97	0.92	0.86		0.91	0.93	0.93
P_deca_25_IQ	0.69	0.85	0.83	0.94	0.9	0.91		0.98	0.93
P_deca_26_IQ	0.75	0.78	0.89	0.97	0.81	0.93	0.98		0.99
P_deca_27_IQ	0.78	0.79	0.9	0.98	0.81	0.93	0.93	0.99
	Protium divaricatum subsp. divaricatum
	P_diva_28_MA	P_diva_29_IQ	P_diva_3_MA	P_diva_31_IQ	P_diva_32_MA	P_diva_33_IQ
P_diva_28_MA		0.97	0.98	0.84	0.87	0.63
P_diva_29_IQ	0.97		0.98	0.78	0.82	0.54
P_diva_3_MA	0.98	0.98		0.79	0.84	0.56
P_diva_31_IQ	0.84	0.78	0.79		0.92	0.89
P_diva_32_MA	0.87	0.82	0.84	0.92		0.72
P_diva_33_IQ	0.63	0.54	0.56	0.89	0.72
	Protium ferruginium
	P_ferr_34_MA	P_ferr_35_IQ	P_ferr_36_MA	P_ferr_37_IQ	P_ferr_38_MA
P_ferr_34_MA		0.66	0.99	0.76	0.57
P_ferr_35_IQ	0.66		0.76	0.89	0.89
P_ferr_36_MA	0.99	0.76		0.85	0.69
P_ferr_37_IQ	0.76	0.89	0.85		0.95
P_ferr_38_MA	0.57	0.89	0.69	0.95
	Protium hebetatum
	P_hebe_39_MA	P_hebe_4_IQ	P_hebe_41_MA	P_hebe_42_MA	P_hebe_43_IQ	P_hebe_44_IQ	P_hebe_45_MA
P_hebe_39_MA		0.59	1	0.79	0.79	0.99	0.7
P_hebe_4_IQ	0.59		0.62	0.77	0.75	0.67	0.88
P_hebe_41_MA	1	0.62		0.8	0.79	0.89	0.71
P_hebe_42_MA	0.79	0.77	0.8		0.99	0.85	0.97
P_hebe_43_IQ	0.79	0.75	0.79	0.99		0.83	0.96
P_hebe_44_IQ	0.99	0.67	0.89	0.85	0.83		0.75
P_hebe_45_MA	0.7	0.88	0.71	0.97	0.96	0.75
	Protium heptaphyllum subs. Ulei
	P_hept_46_IQ	P_hept_47_MA	P_hept_48_IQ	P_hept_49_IQ	P_hept_5_MA	P_hept_51_MA	P_hept_52_MA
P_hept_46_IQ		0.89	0.87	0.59	0.33	0.16	0.78
P_hept_47_MA	0.89		0.9	0.53	0.51	0.43	0.63
P_hept_48_IQ	0.87	0.9		0.45	0.3	0.24	0.48
P_hept_49_IQ	0.59	0.53	0.45		0.38	0.23	0.78
P_hept_5_MA	0.33	0.51	0.3	0.38		0.83	0.47
P_hept_51_MA	0.16	0.43	0.24	0.23	0.83		0.23
P_hept_52_MA	0.78	0.63	0.48	0.78	0.47	0.23
	Protium subserratum (morphotype 2)
	P_lobo_53_MA	P_lobo_54_MA	P_lobo_55_IQ	P_lobo_56_IQ	P_lobo_57_IQ	P_lobo_58_MA	P_lobo_59_MA
P_lobo_53_MA		0.97	0.91	0.86	0.27	0.46	0.77
P_lobo_54_MA	0.97		0.98	0.96	0.26	0.37	0.75
P_lobo_55_IQ	0.91	0.98		0.89	0.16	0.23	0.66
P_lobo_56_IQ	0.86	0.96	0.89		0.26	0.33	0.78
P_lobo_57_IQ	0.27	0.26	0.16	0.26		0.69	0.23
P_lobo_58_MA	0.46	0.37	0.23	0.33	0.69		0.61
P_lobo_59_MA	0.77	0.75	0.66	0.78	0.23	0.61
	Protium opacum
	P_opac_6_MA	P_opac_61_MA	P_opac_62_IQ	P_opac_63_MA	P_opac_64_IQ	P_opac_65_MA	P_opac_66_MA	P_opac_67_IQ	P_opac_68_MA	P_opac_69_MA	P_opac_7_IQ	P_opac_71_MA		P_opac_72_IQ
P_opac_6_MA		0.89	0.64	0.5	0.98	0.5	0.52	0.64	0.83	0.18	0.43	0.34		0.18
P_opac_61_MA	0.89		0.79	0.58	0.86	0.58	0.58	0.72	0.86	0.24	0.45	0.36		0.23
P_opac_62_IQ	0.64	0.79		0.79	0.67	0.58	0.87	0.64	0.99	0.51	0.9	0.8		0.55
P_opac_63_MA	0.5	0.58	0.79		0.57	0.32	0.99	0.37	0.82	0.25	0.82	0.86		0.25
P_opac_64_IQ	0.98	0.86	0.67	0.57		0.53	0.57	0.66	0.86	0.24	0.5	0.43		0.24
P_opac_65_MA	0.5	0.58	0.58	0.32	0.53		0.35	0.93	0.52	0.72	0.55	0.54		0.7
P_opac_66_MA	0.52	0.58	0.87	0.99	0.57	0.35		0.35	0.83	0.22	0.87	0.83		0.22
P_opac_67_IQ	0.64	0.72	0.64	0.37	0.66	0.93	0.35		0.62	0.68	0.53	0.43		0.68
P_opac_68_MA	0.83	0.86	0.99	0.82	0.86	0.52	0.83	0.62		0.25	0.74	0.65		0.24
P_opac_69_MA	0.18	0.24	0.51	0.25	0.24	0.72	0.22	0.68	0.25		0.64	0.63		0.99
P_opac_7_IQ	0.43	0.45	0.9	0.82	0.5	0.55	0.87	0.53	0.74	0.64		0.93		0.63
P_opac_71_MA	0.34	0.36	0.8	0.86	0.43	0.54	0.83	0.43	0.65	0.63	0.93			0.63
P_opac_72_IQ	0.18	0.23	0.55	0.25	0.24	0.7	0.22	0.68	0.24	0.99	0.63	0.63
	Protium paniculatum
	P_pani_73_IQ	P_pani_74_MA	P_pani_75_MA	P_pani_76_IQ	P_pani_77_IQ	P_pani_78_MA
P_pani_73_IQ		0.79	0.73	0.75	0.94	0.74
P_pani_74_MA	0.79		0.97	0.97	0.89	0.98
P_pani_75_MA	0.73	0.97		1	0.82	0.94
P_pani_76_IQ	0.75	0.97	1		0.83	0.94
P_pani_77_IQ	0.94	0.89	0.82	0.83		0.86
P_pani_78_MA	0.74	0.98	0.94	0.94	0.86
